# Supplementary material
Source: HighWire-hosted journal article supplement (https://bmjopen.bmj.com/content/12/4/e057504)
Supplement: inline-supplementary-material-3 [file inline-supplementary-material-3.pdf]

## Supplemental Material 3

Table S3.1: Participant outcomes

| Type      | Outcome                                                                                  | Specific measurement variable                                                                                                     | Analysis metric                    | Method of aggregation                                                           | Time point                                                         |
|-----------|------------------------------------------------------------------------------------------|-----------------------------------------------------------------------------------------------------------------------------------|------------------------------------|---------------------------------------------------------------------------------|--------------------------------------------------------------------|
| Primary   | All cause mortality within 30 days from the time of arrival to the emergency department  | Death as reported in patient records or by a patient contact person during telephone follow up.                                   | Final value / Change from baseline | Proportion / Difference in proportions between baseline and after intervention. | 30 days from the time of arrival to the emergency department.      |
| Secondary | All cause mortality within 24 hours from the time of arrival to the emergency department | Death as reported in patient records or by a patient contact person during telephone follow up.                                   | Final value / Change from baseline | Proportion / Difference in proportions between baseline and after intervention. | 24 hours from the time of arrival to the emergency department.     |
| Secondary | Time to all cause mortality during follow up                                             | Time to (in days) death as reported in patient records or by a patient contact person during telephone follow up.                 | Final value / Change from baseline | Survival analysis, hazard.                                                      | End of follow up.                                                  |
| Secondary | Cause-specific in-hospital mortality                                                     | Categorical presumed cause of death as judged by the treating physician. Recorded by asking the physician.                        | Final value / Change from baseline | Proportion / Difference in proportions between baseline and after intervention. | End of follow up.                                                  |
| Secondary | Adherence to the WHO trauma care checklist*                                              | The number of items in the WHO trauma care checklist* that is adhered to during initial management. Recorded through observation. | Final value / Change from baseline | Mean / median.                                                                  | On first encounter with surgical unit in the emergency department. |

Table S3.1: Participant outcomes (*continued*)

| Type      | Outcome                                                                                                                                                                          | Specific measurement variable                                                                                                                                                                  | Analysis metric                     | Method of aggregation      | Time point                                                                   |
|-----------|----------------------------------------------------------------------------------------------------------------------------------------------------------------------------------|------------------------------------------------------------------------------------------------------------------------------------------------------------------------------------------------|-------------------------------------|----------------------------|------------------------------------------------------------------------------|
| Secondary | Fluids for resuscitation in first one hour in patients                                                                                                                           | The type of fluids, i.e. crystalloids, colloids or blood products, used in the first hour after arrival to the emergency department. Recorded through observation.                             | Final value / Change from baseline  | Proportion.                | During the first hour after the patient arrived at the emergency department. |
| Secondary | Massive transfusion, defined as four or more units of packed red blood cells, plasma or platelets transfused within the first 24 hours after arrival to the emergency department | The number of units of packed red blood cells, plasma or platelets transfused during the first 24 hours after the patient arrived at the emergency department. Extracted from patient records. | Final value / Change from baseline. | Proportion.                | 24 hours from the time of arrival to the emergency department.               |
| Secondary | Time to first surgery                                                                                                                                                            | The time, in hours, from the patient's first encounter with the surgical unit, to start of surgery. Extracted from patient records.                                                            | Time to event.                      | Survival analysis, hazard. | 24 hours from the time of arrival to the emergency department.               |
| Secondary | Time to first intubation                                                                                                                                                         | The time, in hours, from the patient's first encounter with the surgical unit, to intubation. Recorded through observation.                                                                    | Time to event.                      | Survival analysis, hazard. | 24 hours from the time of arrival to the emergency department.               |

Table S3.1: Participant outcomes (*continued*)

| Type      | Outcome                 | Specific measurement variable                                                                                                                                | Analysis metric                     | Method of aggregation      | Time point                                                                                                    |
|-----------|-------------------------|--------------------------------------------------------------------------------------------------------------------------------------------------------------|-------------------------------------|----------------------------|---------------------------------------------------------------------------------------------------------------|
| Secondary | Time to CT scan         | The time, in hours, from the patient's first encounter with the surgical unit, to CT scan.<br>Extracted from patient records.                                | Time to event.                      | Survival analysis, hazard. | 24 hours from the time of arrival to the emergency department.                                                |
| Secondary | Ventilator free days    | The number of days, out of the total length of hospital stay, that the patient is not mechanically ventilated.<br>Extracted from patient records.            | Final value / Change from baseline  | Mean / median.             | At patient discharge.                                                                                         |
| Secondary | ICU free days           | The number of days, out of the total length of hospital stay, that the patient is not admitted to the ICU.<br>Extracted from patient records.                | Final value / Change from baseline  | Mean / median.             | On patient discharge.                                                                                         |
| Secondary | Pulmonary complications | Measured by identifying new infiltrates/consolidations on X-ray chest or CT-scan chest or diagnosed by a clinician or reintubated after initially extubated. | Final value / Change from baseline. | Proportion.                | On patient discharge or 30 days from the time of arrival to the emergency department, whichever occurs first. |

Table S3.1: Participant outcomes (*continued*)

| Type      | Outcome        | Specific measurement variable                                                                                                                                                    | Analysis metric                     | Method of aggregation | Time point                                                                                                    |
|-----------|----------------|----------------------------------------------------------------------------------------------------------------------------------------------------------------------------------|-------------------------------------|-----------------------|---------------------------------------------------------------------------------------------------------------|
| Secondary | Septic shock   | Measured by recognizing patients needing vasopressor support beyond the first 48 hours or new initiation of vasopressors in the absence of bleeding or diagnosed by a clinician. | Final value / Change from baseline. | Proportion.           | On patient discharge or 30 days from the time of arrival to the emergency department, whichever occurs first. |
| Secondary | Renal failure  | Measured by identifying a patient on dialysis or diagnosed by a clinician.                                                                                                       | Final value / Change from baseline. | Proportion.           | On patient discharge or 30 days from the time of arrival to the emergency department, whichever occurs first. |
| Secondary | Coagulopathy   | Measured by transfusion of plasma /platelets                                                                                                                                     | Final value / Change from baseline. | Proportion.           | On patient discharge or 30 days from the time of arrival to the emergency department, whichever occurs first. |
| Secondary | Length of stay | The number of days that the patient is admitted to the hospital. Extracted from patient records.                                                                                 | Final value / Change from baseline  | Mean / median.        | On patient discharge.                                                                                         |

Table S3.1: Participant outcomes (*continued*)

| Type      | Outcome                                                                          | Specific measurement variable                                                                                                                 | Analysis metric                    | Method of aggregation                          | Time point                                                    |
|-----------|----------------------------------------------------------------------------------|-----------------------------------------------------------------------------------------------------------------------------------------------|------------------------------------|------------------------------------------------|---------------------------------------------------------------|
| Secondary | Quality of life                                                                  | Measured using the appropriate translation of EQ5D3L. Recorded through interview or telephone follow up.                                      | Final value / Change from baseline | Proportion or mean/median depending on domain. | 30 days from the time of arrival to the emergency department. |
| Secondary | Number of hospitalizations after the index admission during the follow up period | The number of hospitalizations after the first (index) admission. Recorded from patient or patient contact person during telephone follow up. | Final value / Change from baseline | Mean / median.                                 | 30 days from the time of arrival to the emergency department. |
| Secondary | Return to work                                                                   | Return to any form of work (including house work), as yes or no. Recorded through interview or telephone follow up.                           | Final value / Change from baseline | Proportion.                                    | 30 days from the time of arrival to the emergency department. |
| Secondary | Need for unplanned re-exploration                                                | New unplanned surgery for a previously operated injury during the index admission. Extracted from patient records.                            | Final value / Change from baseline | Proportion.                                    | 30 days from the time of arrival to the emergency department. |

Table S3.1: Participant outcomes (*continued*)

| Type      | Outcome                             | Specific measurement variable                                                                                                                                                                                             | Analysis metric                    | Method of aggregation | Time point                                                                            |
|-----------|-------------------------------------|---------------------------------------------------------------------------------------------------------------------------------------------------------------------------------------------------------------------------|------------------------------------|-----------------------|---------------------------------------------------------------------------------------|
| Secondary | Failure of non-operative management | Surgery for initially non-operatively treated conditions, for example liver or splenic injury in stable patients. Extracted from patient records.                                                                         | Final value / Change from baseline | Proportion.           | 48 hours.                                                                             |
| Secondary | Patient satisfaction                | Patient satisfaction measured in Likert scale of 1-5 from Not satisfied to Satisfied completely about their hospital experience that includes healthcare person's behaviour and care received (from Harris et al. 2007)]. | Final value / Change from baseline | Median                | Prior to discharge                                                                    |
| Secondary | Out-of-pocket expenditure           | Direct out-of-pocket expenditure (in Indian Rupees, INR) on medicines, diagnostics, medical equipment, and follow-up treatment recorded through interview or telephone follow-up.                                         | Final value / Change from baseline | Mean/Median           | At patient discharge and 30 days from the time of arrival to the emergency department |

Table S3.1: Participant outcomes (*continued*)

| Type      | Outcome                                           | Specific measurement variable                                                                      | Analysis metric                     | Method of aggregation | Time point                                                    |
|-----------|---------------------------------------------------|----------------------------------------------------------------------------------------------------|-------------------------------------|-----------------------|---------------------------------------------------------------|
| Secondary | Self-ambulatory                                   | Whether or not the patient can walk unassisted. Recorded through interview or telephone follow up. | Final value / Change from baseline  | Proportion.           | 30 days from the time of arrival to the emergency department. |
| Secondary | Residents' confidence in managing trauma patients | Visual Analogue Scale. Recorded through interview.                                                 | Final value / Change from baseline. | Median.               | 30 days from the time of training, or study start.            |

*Note:*

\* The World Health Organization's trauma care checklist is available from <https://www.who.int/publications/i/item/trauma-care-checklist> and its implementation was published as Lashoher A, Schneider EB, Juillard C, Stevens K, Colantuoni E, Berry WR, Bloem C, Chadbunchachai W, Dharap S, Dy SM, Dziekan G, Gruen RL, Henry JA, Huwer C, Joshipura M, Kelley E, Krug E, Kumar V, Kyamanywa P, Mefire AC, Musafir M, Nathens AB, Ngendahayo E, Nguyen TS, Roy N, Pronovost PJ, Khan IQ, Razzak JA, Rubiano AM, Turner JA, Varghese M, Zakirova R, Mock C. Implementation of the World Health Organization Trauma Care Checklist Program in 11 Centers Across Multiple Economic Strata: Effect on Care Process Measures. *World J Surg.* 2017 Apr;41(4):954-962. doi: 10.1007/s00268-016-3759-8. PMID: 27800590.
